# Supplementary material for: Mapping charged silver(i) adenine polymers, [Adx+ Agy−zH](y − z)+, via electrospray ionization tandem mass spectrometry experiments
Source: Royal Society of Chemistry journal article supplement (doi:10.1039/b206824a), 2002-01-01
Supplement: b206824a.pdf [file b206824a.pdf]

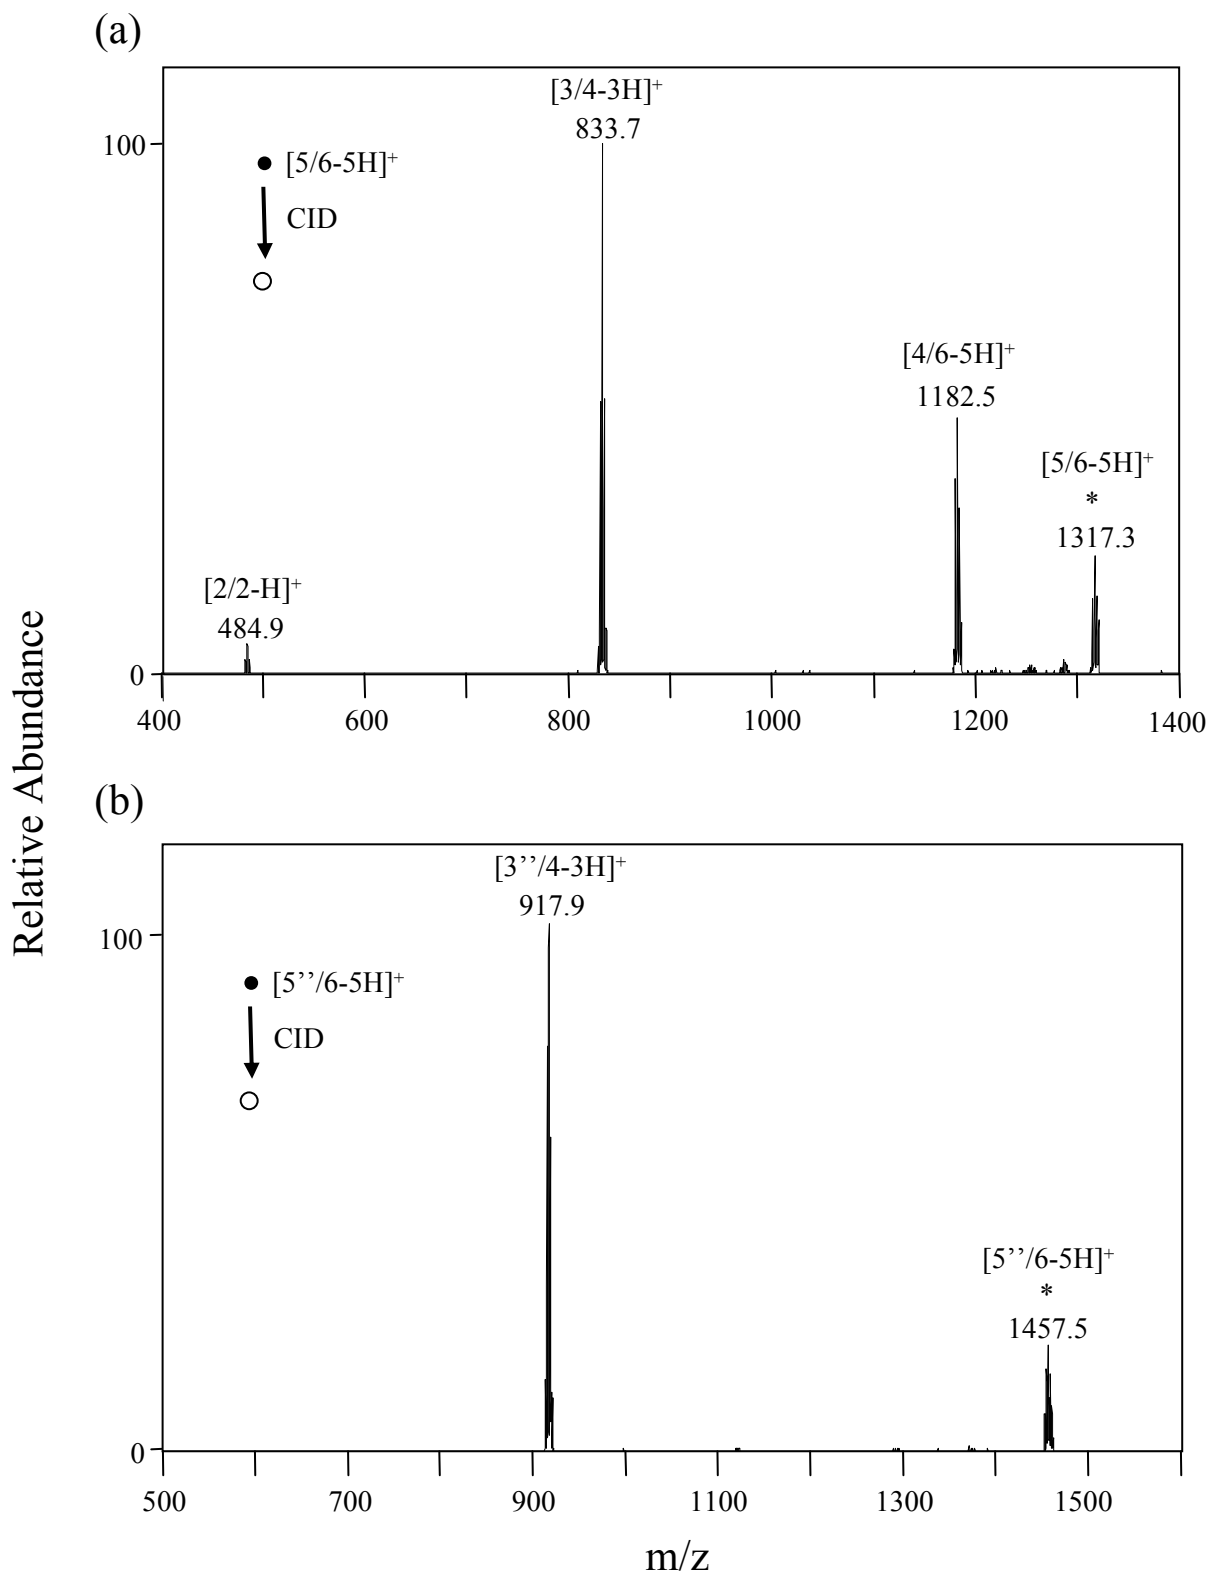

**Figure S1.** LCQ CID MS/MS of the  $[5/6-5H]^+$  ion of (a) adenine; (b) 6-N,N-dimethyladenine. Note that adducts with background water or methanol are denoted as ‡ and § respectively.

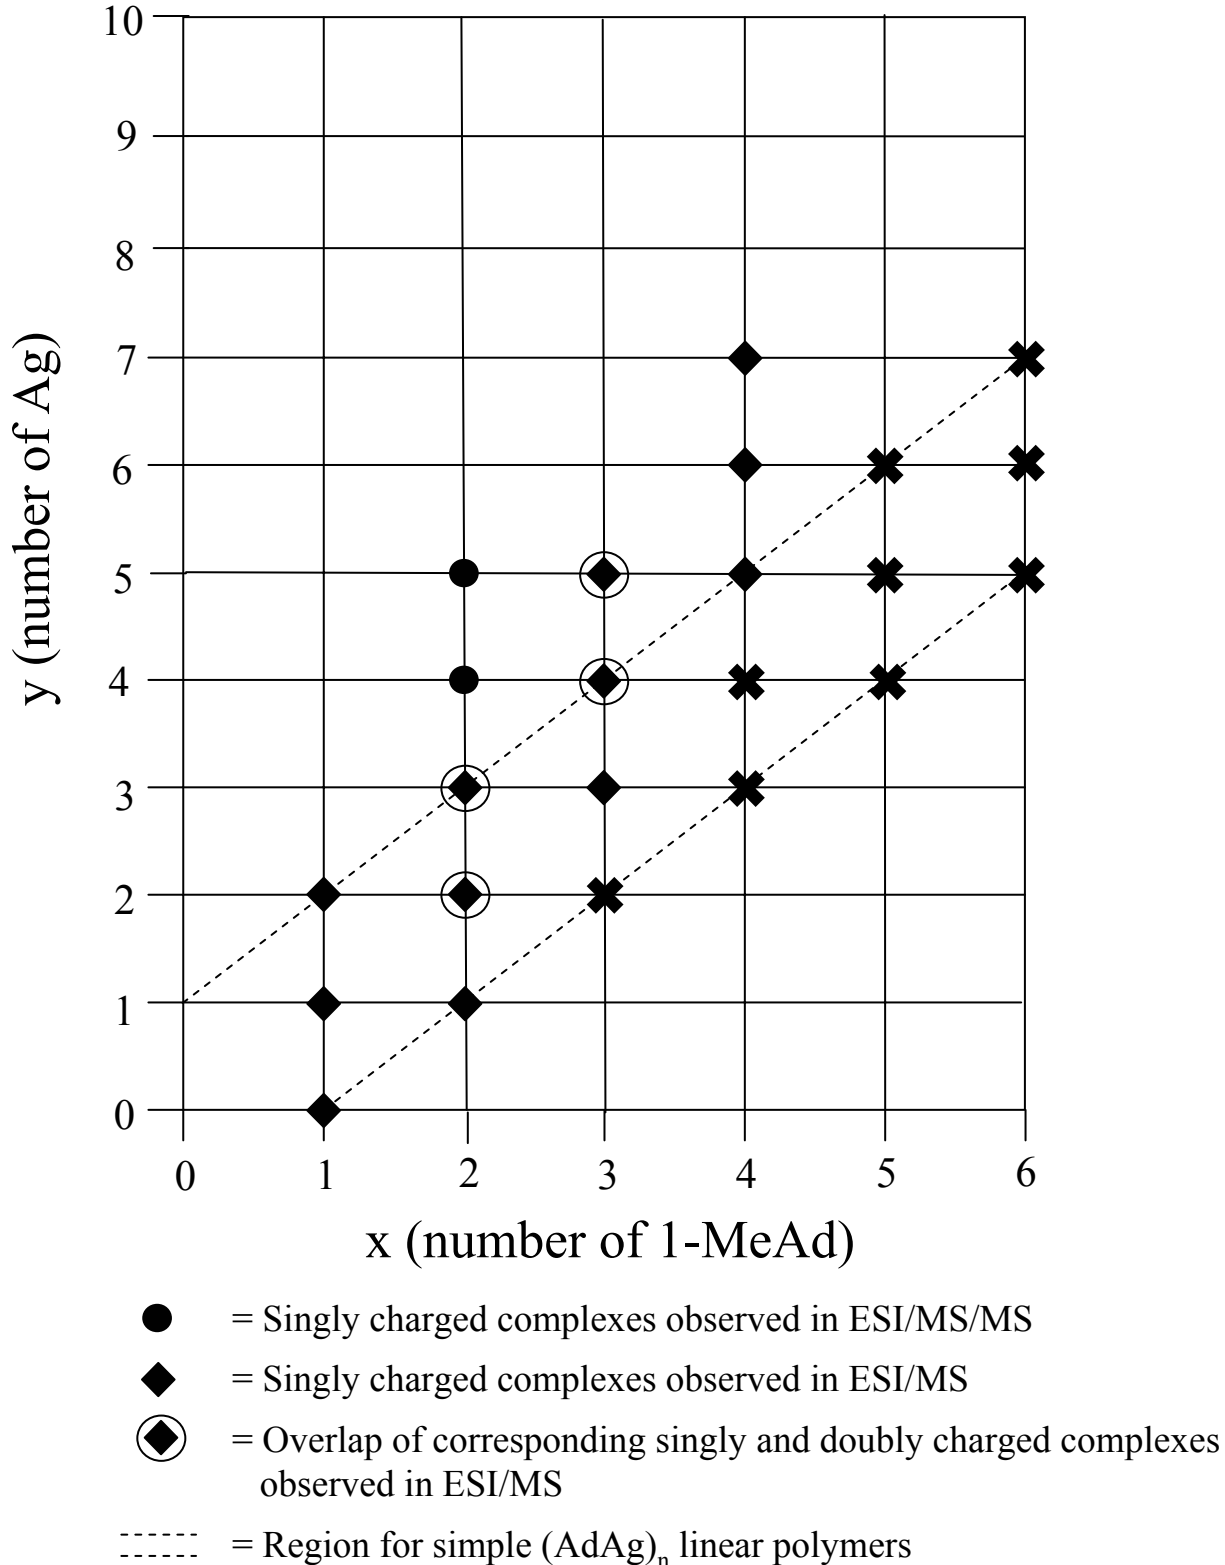

**Figure S2.** Map of the  $[1\text{-MeAd}_x + \text{Ag}_y\text{-zH}]^{(y-z)+}$  ions observed in the ESI/MS and MS/MS spectra of a 2:1 solution of  $\text{AgNO}_3$  with 1-methyladenine in the ion trap. The numbers of adenine and silver ions in each polymer ion are plotted as x versus y on the map.

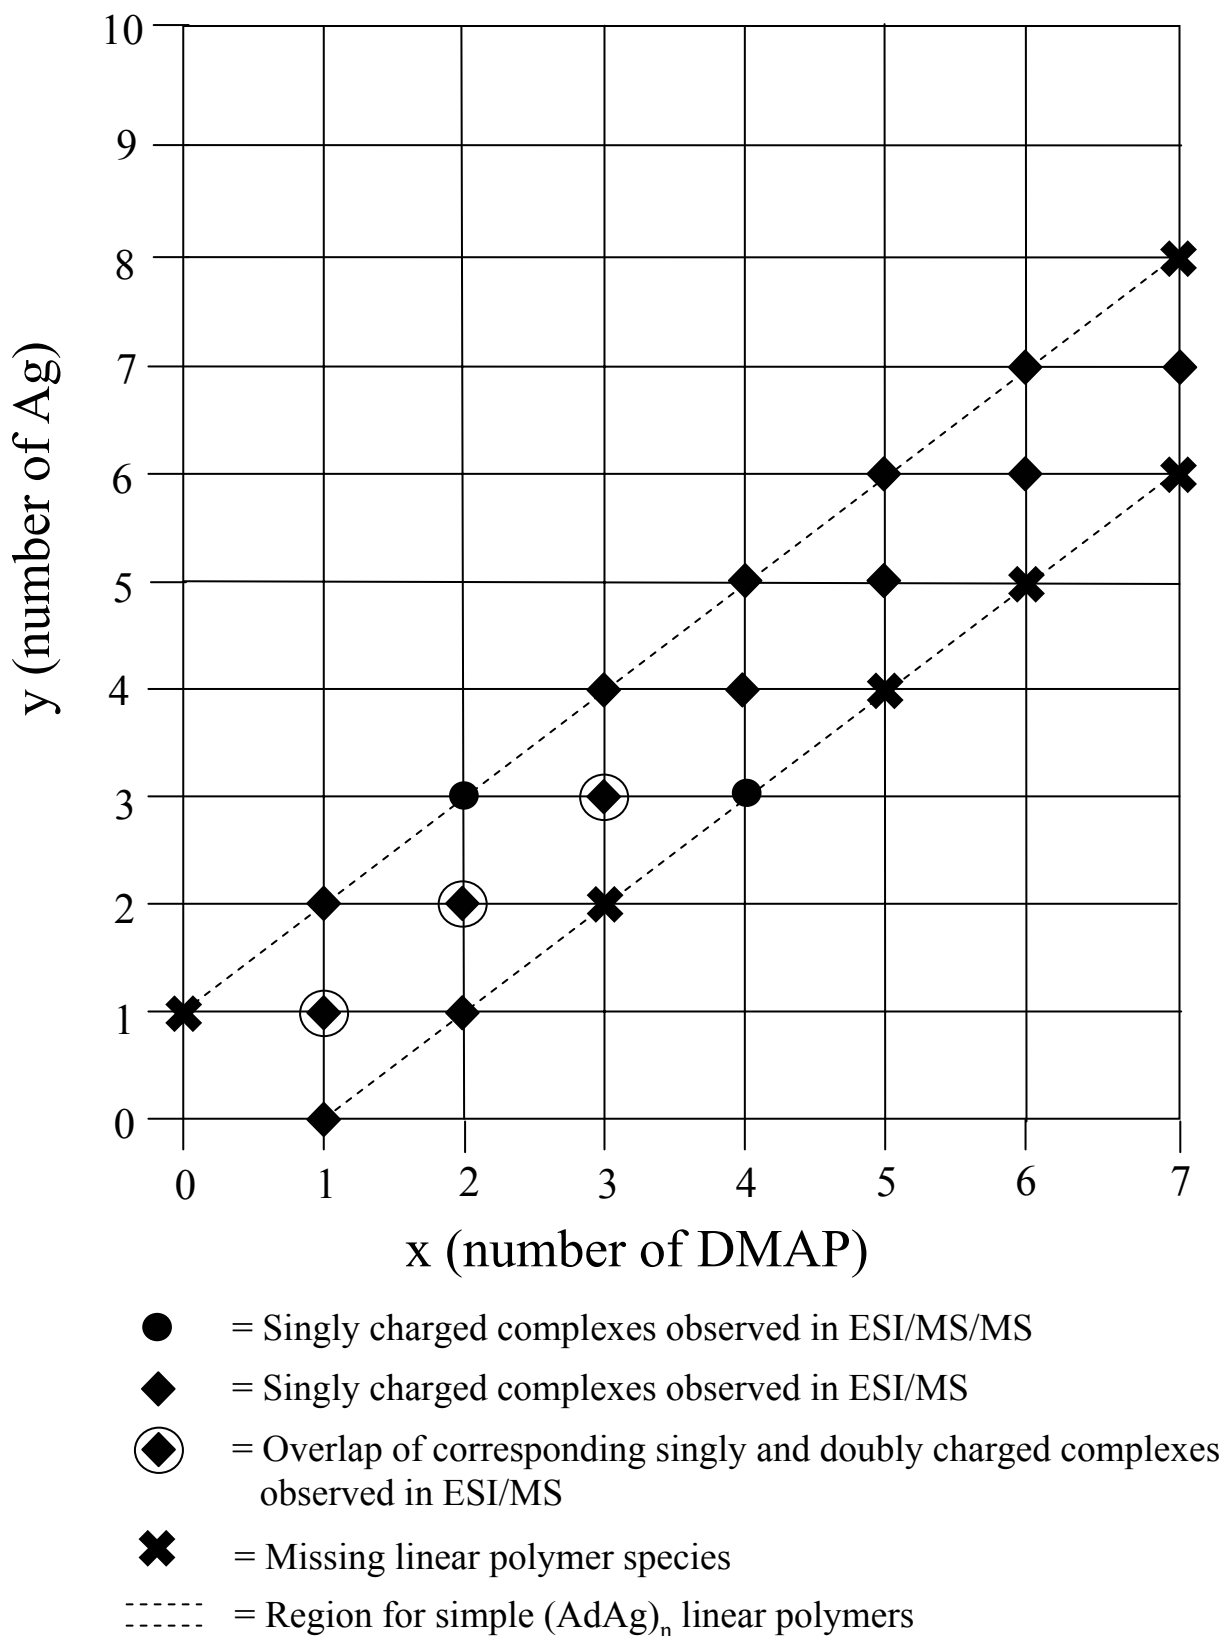

**Figure S3.** Map of the  $[6\text{-N,N-Ad}_x+\text{Ag}_y\text{-zH}]^{(y-z)+}$  ions observed in the ESI/MS and MS/MS spectra of a 2:1 solution of  $\text{AgNO}_3$  with 6-N,N-dimethyladenine in the ion trap. The numbers of adenine and silver ions in each polymer ion are plotted as x versus y on the map.
